# Supplementary material for: The Role of Coarse Aerosol Particles as a Sink of HNO 3 in Wintertime Pollution Events in the Salt Lake Valley
Source: Copernicus journal article supplement (doi:10.5194/acp-2020-21), 2020-01-29
Supplement: Supplementary file 1 [file acp-2020-21-supplement.pdf]

## Supplementary Information for:

# The Role of Coarse Aerosol Particles as a Sink of HNO<sub>3</sub> in Wintertime Pollution Events in the Salt Lake Valley

5

Amy Hrdina<sup>1\*</sup>, Jennifer G. Murphy<sup>1</sup>, Anna Gannet Hallar<sup>2</sup>, John C. Lin<sup>2</sup>, Alexander Moravek<sup>1\*\*</sup>, Ryan Bares<sup>2</sup>, Ross C. Petersen<sup>2\*\*\*</sup>, Alessandro Franchin<sup>3,4</sup>, Ann M. Middlebrook<sup>3</sup>, Lexie Goldberger<sup>5\*\*\*\*</sup>, Ben H. Lee<sup>4</sup>, Munkh Baasandorj<sup>2</sup>, Steven S. Brown<sup>3</sup>

<sup>1</sup>Department of Chemistry, University of Toronto, Toronto, ON, M5S 0A6, Canada

10 <sup>2</sup>Department of Atmospheric Sciences, University of Utah, Salt Lake City, UT, 84112, USA

<sup>3</sup>NOAA Earth System Research Laboratory (ESRL) Chemical Sciences Division, Boulder, CO, 80305, USA

<sup>4</sup>Cooperative Institute for Research in Environmental Sciences (CIRES), University of Colorado, Boulder, CO, 80309, USA

<sup>5</sup>University of Washington, Department of Atmospheric Sciences, Seattle, WA, 98195, USA

\*Now at Department of Civil and Environmental Engineering, Massachusetts Institute of Technology, Cambridge, MA, USA

15 \*\*Now at Department of Chemistry, York University, Toronto, ON, M3J 1P3, Canada

\*\*\*Now at Department of Physical Geography and Ecosystem Science, Lund University, Sweden

\*\*\*\*Now at Pacific Northwest National Laboratory

Snow Composition Data

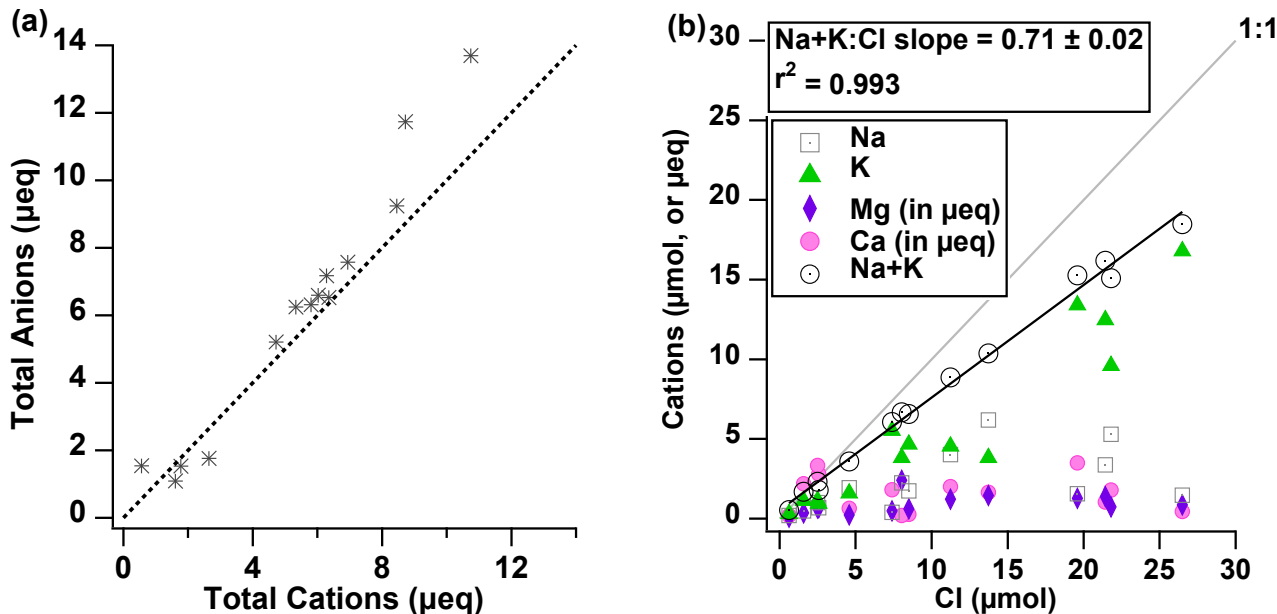

Figure S1: a) Daily total μequivalents of anions ( $\text{Cl}^-$ ,  $\text{NO}_3^-$ , and  $\text{SO}_4^{2-}$ ) and cations ( $\text{Na}^+$ ,  $\text{K}^+$ ,  $\text{NH}_4^+$ ,  $\text{Mg}^{2+}$ , and  $\text{Ca}^{2+}$ ) within the entire snow column from 21 January to 3 February 2017 during which PCAP episode occurred. The 1:1 ratio is shown in the dashed line.  
b) Daily total μmols of  $\text{Na}^+$ ,  $\text{K}^+$  and total μequivalents of  $\text{Mg}^{2+}$  and  $\text{Ca}^{2+}$  with respect to total μmols of  $\text{Cl}^-$  within the entire snow column.

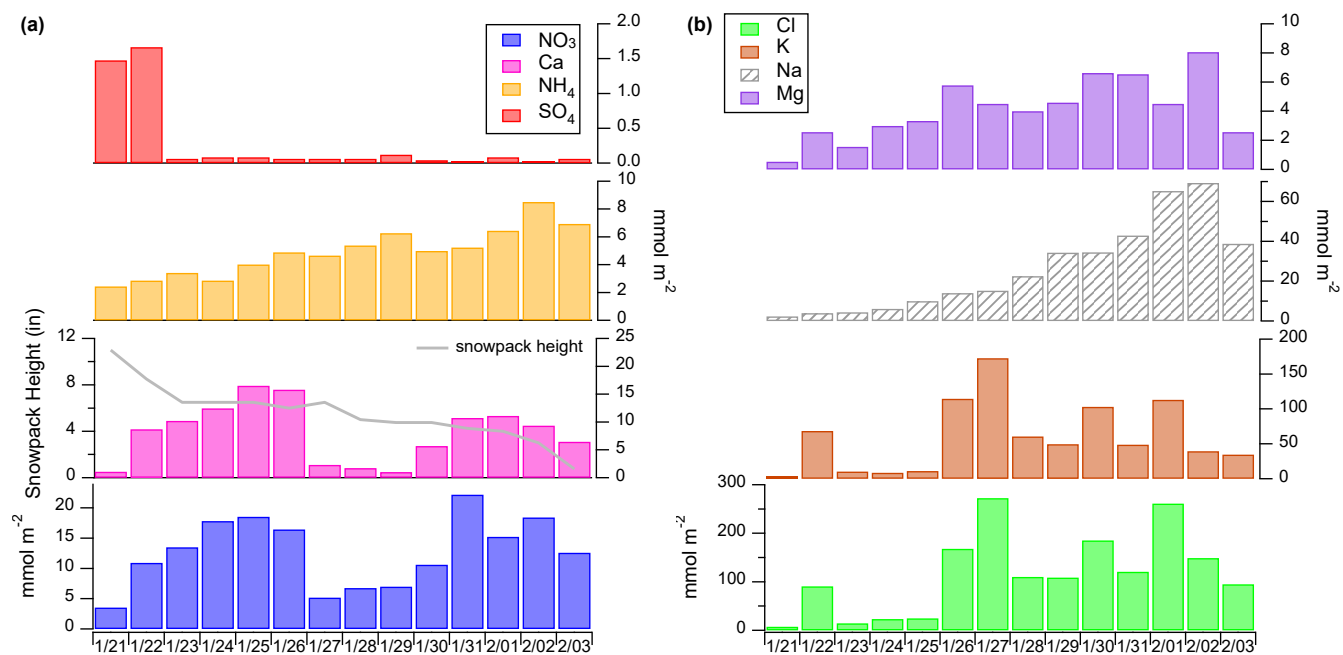

**Figure S2: Daily series of composition changes of  $\text{SO}_4^{2-}$ ,  $\text{NH}_4^+$ ,  $\text{Ca}^{2+}$ , and  $\text{NO}_3^-$  (a) and  $\text{Mg}^{2+}$ ,  $\text{Na}^+$ ,  $\text{K}^+$ , and  $\text{Cl}^-$  (b) within the entire snow column from 21 January to 3 February 2017 during PCAP episode 1.**
