# Supplementary material for: The Role of Coarse Aerosol Particles as a Sink of HNO 3 in Wintertime Pollution Events in the Salt Lake Valley
Source: Copernicus journal article supplement (doi:10.5194/acp-2020-21), 2020-01-29
Supplement: Supplementary file [file acp-2020-21-AC1-supplement.pdf]

We thank the reviewer for their constructive comments (shown in red below) and our responses and proposed changes to the text are shown in black

Anonymous Referee #1

Received and published: 30 March 2020

This paper analyzes data from pollution events in Salt Lake City during cold periods when strong inversions lead to generation of PM<sub>2.5</sub> ammonium nitrate. The analysis is limited in that there was not overlap in all instruments during periods of interest. For example, the APS measuring coarse mode size distributions was only operational during a short period of the overall study. It did coincide with a PM<sub>2.5</sub> event, but during that event there was no PM<sub>2.5</sub> aerosol data. This makes much of the analysis more speculative. Overall, the analysis is somewhat obtuse, especially the thermodynamic analysis, which could use more explanation and additional details. It would benefit from a more rigorous approach in which particle pH and partitioning of ammonium nitrate is discussed. There are some other clarifications needed, which are discussed below.

Is the measurement site representative of the greater SLC area? Does its elevation influence this?

The measurement site is located on the edge of the valley but remains within the cold air pool during pollution events, which can be confirmed by the TEOM and AIM-IC data. Due to the meteorological stability of the PCAP and the hourly sampling time of the AIM-IC, the chemical composition of PM<sub>2.5</sub> measured there is considered generally representative of the PM<sub>2.5</sub> that is present throughout the valley. Previous studies measuring at the base of the valley show similar average chemical composition (Kuprov et al. 2014).

Pg 2, Lines 15 to 16 regarding the health effects of NH<sub>4</sub>NO<sub>3</sub>. The logic is NH<sub>4</sub>NO<sub>3</sub> drives PM<sub>2.5</sub> mass, PM<sub>2.5</sub> mass is associated with adverse health and is regulated, so NH<sub>4</sub>NO<sub>3</sub> has adverse health implications and should be reduced to meet PM<sub>2.5</sub> regulations. This is standard logic and so a reasonable statement, but if the authors really want to be precise, there is debate if NH<sub>4</sub>NO<sub>3</sub> is toxic. The authors could easily add more details since health studies have been performed for the regions they are measuring, such as [Watterson et al., 2007]. The results are not as clear as the statement in this paper.

It is true there is an important discussion around whether NH<sub>4</sub>NO<sub>3</sub> itself is toxic. For example, Park et al. 2018 evaluate toxicity scores for several types of particles and final minimal biological response to pure ammonium nitrate. However, the current PM<sub>2.5</sub> regulations are still mass based; therefore, from a policy standpoint reducing NH<sub>4</sub>NO<sub>3</sub> will reduce overall PM<sub>2.5</sub> mass down to the NAAQS. We framed our introduction in that context.

Ref: Park, M., Joo, H.S., Lee, K. *et al.* Differential toxicities of fine particulate matters from various sources. *Sci Rep* **8**, 17007 (2018). <https://doi.org/10.1038/s41598-018-35398-0>

Also, why not discuss an environmental effect that can be directly linked to NH<sub>4</sub>NO<sub>3</sub>, the effect on visibility and haze due to its hygroscopicity, and what about nitrogen deposition; the latter seems especially important since this paper is really about deposition?

We have now included a discussion of the effect of  $\text{NH}_4\text{NO}_3$  visibility and haze events that are characteristic of PCAPs in the region.

Pg 5 line 3, could not find the Markovic ref. Is the chemistry of the water for the wet denuder and aerosol collector altered to help adsorb species? This is most likely an issue for the wet denuder that is collecting both anions and cations gases. That is, is an absorbing species added to liquid or is it pure water?

Markovic et al. 2012 has been added to the reference list. In brief, the parallel-plate wet denuder had a constant flow of dilute (5 mM) peroxide solution through the membranes, which increases the collection efficiency of  $\text{SO}_2$  without compromising the collection of acidic and basic gases. The aerosol collector is a steam chamber (fed by distilled and deionized water) that hygroscopically grows PM that is forced into solution when passed through a cyclone.

Ref: Markovic, M.Z., VandenBoer, T.C., Murphy J.G., "Characterization and optimization of an online system for the simultaneous measurement of atmospheric water-soluble constituents in the gas and particles phases" *J Environ Monitor*, 14 (7), 1872 – 1884, 2012.

What is the RH of the aerosol sampled by the TEOM and APS? Are the particles dry? Fig 1 is a nice schematic. It might be more insightful to plot the gases in units of  $\mu\text{g}/\text{m}^3$  to allow direct comparison with aerosol concentrations, instead of mixing ratios. Although mixing ratios are more traditional. It should be noted in Fig 3 caption or the text that the total fine mode surface area spans sizes 0.54 to 2.5  $\mu\text{m}$  since it was measured by the APS. Is that really total fine particle surface area? Are the particles dry?

Fig 1. and Fig 3. were updated according to the reviewer's suggestion. The APS measured particles at ambient RH. The TEOM used during this study did have a heated inlet tube which aims to keep the sample stream at 50 degrees C. This is standard operating procedure for TEOMs that are EPA federally equivalent methods. We acknowledge the heated inlet likely volatilizes some of the particles resulting in a slight under-estimation of PM during PCAPs. Side-by-side comparison tests that were conducted by the Air Quality Lab at the U of U, showed that the differences between the two instruments are typically small (less than 2  $\mu\text{g}/\text{m}^3$  during very strong PCAPs that exceed NAAQS).

Pg 9, the equation for uptake of  $\text{HNO}_3$  by coarse mode particles seems incorrect. It looks to be the formula for free molecular regime uptake, which does not apply to coarse mode particles. A correction factor due to diffusional resistance, ie something that can be derived from the size distribution and some transition regime mass transfer formula, like Fuchs Sutugin, see Seinfeld and Pandis, may be needed.

The reviewer is correct that the pseudo-first order uptake equation does not account for any diffusion limitations that occur with larger particles and large uptake coefficients. This is the upper limit to the potential  $\text{HNO}_3$  uptake loss rate to the coarse mode, as we specified in the manuscript.

Pg 13, line 8-9, This result is expected since. . . . Please clarify.

Further explanation was added in the section highlighted by the reviewer. “To examine the sensitivity of the  $\text{NH}_4\text{NO}_3$  system to the presence of non-volatile cations, addition of  $\text{pNa}^+$ ,  $\text{pCa}^{2+}$ ,  $\text{pMg}^{2+}$  and  $\text{pK}^+$  in ISORROPIA model runs underestimated the  $\text{NH}_4\text{NO}_3$  concentrations observed. This large underestimation of  $\text{NH}_4\text{NO}_3$  is driven by the implicit model assumptions that all particles measured by the AIM-IC have the same chemical composition and that non-volatile cations are associated with particle nitrate, which is unlikely to be the case. However, the model does show that inclusion of non-volatile cations has a strong influence in retaining  $\text{NO}_3$  in the particle phase.”

It might be better to compare the predicted gas and particle partitioning, not  $\text{NH}_4\text{NO}_3$  predicted, which is the form that is being assumed that the model is predicting (ie, the model does not output the  $\text{NH}_4\text{NO}_3$  concentration it outputs  $\text{NH}_4^+$  and  $\text{NO}_3^-$ , along with other species, so I assume the authors are simply taking the output  $\text{NO}_3^-$  adding the  $\text{NH}_4^+$  and comparing to a similar addition of data in the form of  $\text{NH}_4^+$  and  $\text{NO}_3^-$ ).

The reviewer’s comment is correct in explaining the modeled  $\text{NH}_4\text{NO}_3$  output is sum of the concentrations of  $\text{NH}_4$  and  $\text{NO}_3$  predicted to be in the particle phase. Due to technical difficulties with the Anion IC (quantifies  $\text{NO}_3$  in gas and particle phase) during the first PCAP, there was no  $\text{pNO}_3^-$  to effectively compare making the  $\text{HNO}_3$  data for the same period also in question. Therefore, the authors are being conservative in focusing on  $\text{NH}_4\text{NO}_3$  by estimating  $\text{pNO}_3^-$  based on measured  $\text{pNH}_4^+$ .

Aerosol pH seems to largely ignored in this work; pH values are never give despite it controlling the concentration of  $\text{NO}_3^-$ . It would be curious, for example, to know what the difference in pH is for with and without cation inclusion. This, and a focus on  $\text{NO}_3^-$  predicted vs observed would help interpret the results and provide more detail than the statement in the paper (line 8-9). It seems that what is being implied here is the model is simply doing an ion balance with the input anion and cations; ie if you add more cations than there will be less predicted  $\text{NH}_4\text{NO}_3$  since there is some  $\text{Ca}_2(\text{NO}_3)_2$  (as an example). But isn’t it much more complex since adding cations changes the pH which affects the partitioning of  $\text{NH}_4^+$  and  $\text{NO}_3^-$ , (and other semivolatile inorganic species, such as  $\text{Cl}^-$ ...). At the higher concentrations, the simulated and measured agree. Why is this happening? Is it consistent with the interpretation of what is happening at lower concentrations? The authors might also consider the assumption of mixing state, they implicitly assuming that everything is internally mixed.

The reviewer is correct that the modelling work in the manuscript assumes a system in which the aerosol particles are internally mixed. It is true that any effective change in calculated pH would affect the partitioning of semi-volatile inorganic species, such as  $\text{NH}_4$  salts. However, nonvolatile species are not as pH sensitive. The authors have added more discussion of  $\text{pNO}_3^-$  being part of both semi-volatile and non-volatile salts, which is shown through the sensitivity analysis of adding non-volatile cations to the simplified modeled system. It is true for semi-volatile forms of nitrate salts, such as  $\text{NH}_4\text{NO}_3$ , pH can be a very useful indicator of thermodynamic partitioning. However, the non-volatile property of other nitrate salts, such as calcium nitrate, does not change with pH. Therefore, the uptake of  $\text{HNO}_3$  onto  $\text{Ca/Mg/K}$  containing particles is irreversible despite any changes in chemical composition and  $\text{RH/T}$ .

At higher concentrations, the system also increases in  $\text{NH}_4^+$  heavily outweighing the cumulative concentrations of  $\text{K}^+$ ,  $\text{Mg}^{2+}$  and  $\text{Ca}^{2+}$ , which may explain why the simulated and observed concentrations of  $\text{NH}_4\text{NO}_3$  become closer in agreement.

The last part of the main text is also not clear (Pg 13, lines 11 to end of section). As I understand it, the idea here is that if all the  $\text{NO}_3^-$  and  $\text{NH}_4^+$  found in snow (which got there by reacting with large particles that then fall out) was instead in the gas phase or in fine particles, and  $\text{PM}_{2.5}$  nonvolatile cations were present, (but no coarse mode), then the predicted  $\text{NH}_4\text{NO}_3$  would be much higher (2x). But it is not clear what this proves. The situation is much more complex, and really requires a full model. Eg, would not the deposition by gases and fine mode particles change between these two cases. This is not considered. The deposition of the gas species of  $\text{NH}_3$  and  $\text{HNO}_3$  is x10 higher than a fine particle, in the case of no coarse mode, the gas concentrations could be much higher and so gas deposition much higher, which could limit  $\text{PM}_{2.5}$   $\text{NH}_4^+$  and  $\text{NO}_3^-$  formation. This is not considered in the analysis presented. The general conclusion that the coarse mode is a sink for Total  $\text{NO}_3$  is clear, but how that impacts  $\text{PM}_{2.5}$   $\text{NH}_4\text{NO}_3$  concentrations (it may be better to just talk about  $\text{NO}_3^-$  concentrations), is not clear from these simplistic analyses.

The purpose of this analysis was to use the composition of the snowpack to assess whether the atmospheric system contains a significant amount of nitrate that is not accounted for when considering only gas phase  $\text{HNO}_3$  and  $\text{PM}_{2.5}$  nitrate. Because we measure gas phase  $\text{NH}_3$  and  $\text{PM}_{2.5}$  ammonium, and we can assume that there is very little coarse mode ammonium in the atmosphere, we can use the ratio of snowpack nitrate: snowpack ammonium to estimate the relative amount of nitrate that is present in the coarse mode. The composition of the snowpack (especially after the snow event) provides some indirect evidence of the sum of the gas and particle phase constituents lost to deposition.

We then perform a sensitivity study using ISORROPIA in which we ask whether this estimate of total atmospheric nitrate would lead to higher amounts of secondary ammonium nitrate given the measured amount of atmospheric  $\text{NH}_x$  present, and assuming that the non-volatile cations were not present. We agree that the  $\text{NH}_4\text{NO}_3$  system is complex and have added more explicit description of testing how sensitive the system is to the presence of coarse particles.

The reviewer is correct in that the dry deposition rates of gases and coarse particles are higher than fine particles, and this is not accounted for in the ISORROPIA model runs. A proper accounting for the impact of reactive non-volatile cations in the coarse mode on the presence of fine mode  $\text{NH}_4\text{NO}_3$  would require a full 3D chemical transport model with interactive sources and sinks. However, in the absence of this type of simulation, we believe our sensitivity analysis demonstrates that the uptake of nitrate by coarse mode particles has the ability to reduce fine mode particle loading.
